# Supplementary material
Source: publisher figshare collection journal article supplement (https://gsajournals.figshare.com/articles/dataset/_/6494774)
Supplement: Supplementary file 1 [file 1]

Archive with 8 entries (8 files):
- Table S2.xlsx
- Table S1.xlsx
- Fig S6.pdf
- Fig S5.pdf
- Fig S4.pdf
- Fig S3.pdf
- Fig S2.pdf
- Fig S1.pdf
