# Supplementary material
Source: publisher figshare collection journal article supplement (https://gsajournals.figshare.com/articles/dataset/_/6494774)
Supplement: Supplementary file 1 [file 1 › Fig S1.pdf]

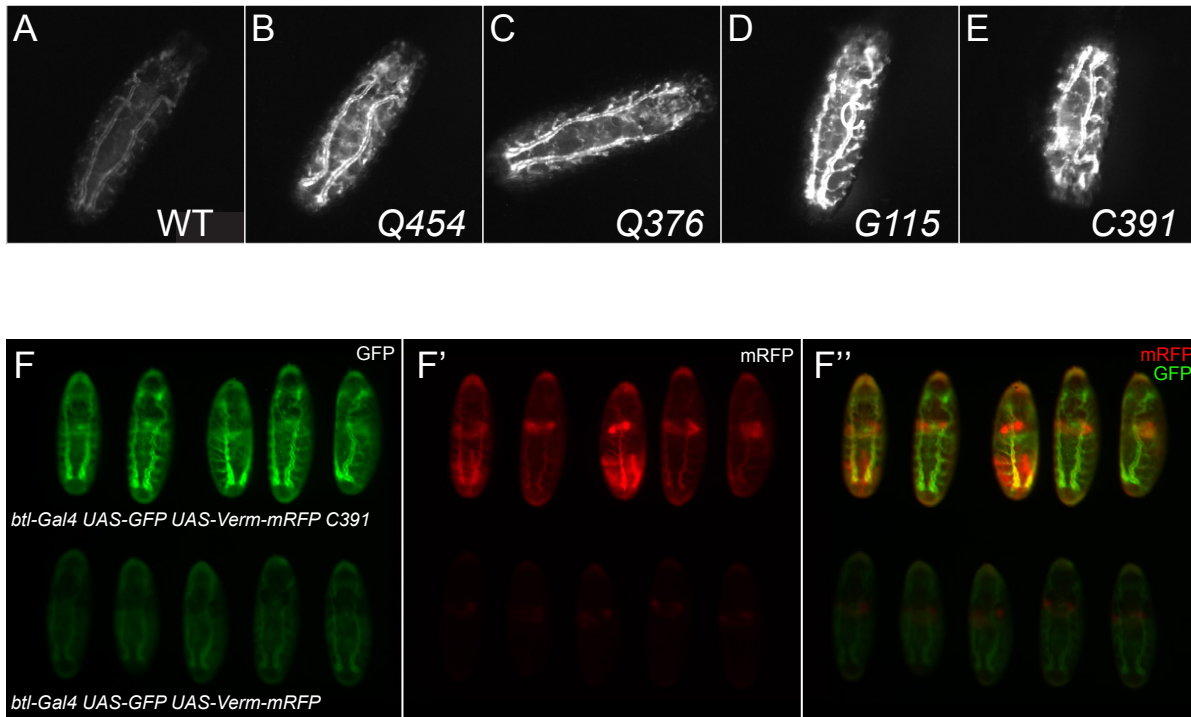

**Figure S1. *Smg5* mutant alleles have enhanced fluorescence of NMD-sensitive reporters in first instar larval trachea.** (A-E) NMD sensitive *eGFP::SV40 3'UTR* fluorescent reporter is expressed in larval trachea by the *btl-GAL4* driver in control (A) and *Smg5* mutant animals (B-E). (F) *UAS-GFP:SV40 3'UTR* and *UAS-Verm-mRFP:3'UTR* coexpressed in the embryonic tracheal system both show fluorescence enhancement (top row of embryos), compared to controls (bottom row of embryos).
