# Supplementary material
Source: publisher figshare collection journal article supplement (https://gsajournals.figshare.com/articles/dataset/_/6494774)
Supplement: Supplementary file 1 [file 1 › Fig S2.pdf]

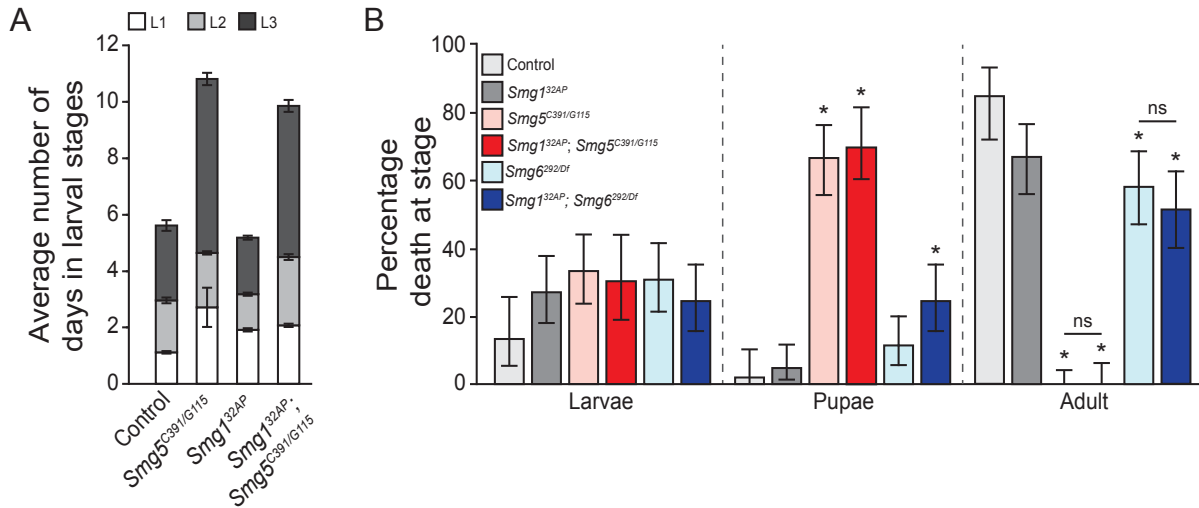

**Figure S2. Lethal phase and developmental delays of single and double mutants for NMD genes.**

**(A)** Average number of days spent during larval stages of animals that entered pupariation in each indicated genotype. Error bars represent 2 SEM. **(B)** Percentage of animals that die during larval development, pupal development, or adulthood in indicated genotypes. Error represents 95% confidence interval of the binomial distribution. \* indicates adjusted p-value < 0.05 compared to lethality of control condition at that stage.
