# Supplementary material
Source: publisher figshare collection journal article supplement (https://gsajournals.figshare.com/articles/dataset/_/6494774)
Supplement: Supplementary file 1 [file 1 › Fig S3.pdf]

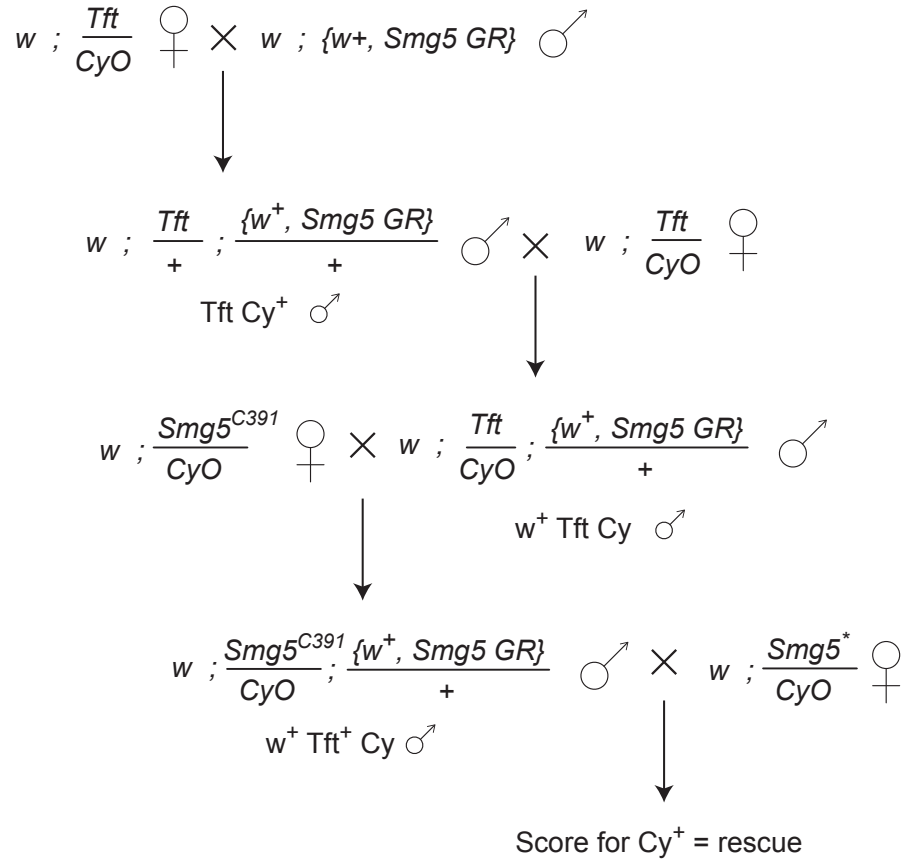

| * <i>Smg5</i> allele        | Cy flies | Cy <sup>+</sup> flies | % rescue |
|-----------------------------|----------|-----------------------|----------|
| <i>Df(2L)b82a2</i>          | 294      | 28                    | 38       |
| <i>Df(2L)b80c1</i>          | 193      | 49                    | 102      |
| <i>Smg5</i> <sup>G115</sup> | 396      | 36                    | 36       |

**Figure S3. *Smg5* genomic rescue.** Top: scheme used to cross *Smg5* genomic rescuing construct ( $\{w^+, Smg5 GR\}$ , on chromosome 3) into a homozygous *Smg5* background. We tested rescue flies *trans*-heterozygous for the *Smg5* null allele C391 and two different deficiencies which remove the *Smg5* locus and for *Smg5*<sup>G115</sup>. Bottom: rescue results. For 100% rescue,  $Cy^+$ :Cy flies are expected to be observed at the ratio of 4:1. % rescue calculated based on the number of Cy flies observed.
