# Supplementary material
Source: publisher figshare collection journal article supplement (https://gsajournals.figshare.com/articles/dataset/_/6494774)
Supplement: Supplementary file 1 [file 1 › Fig S4.pdf]

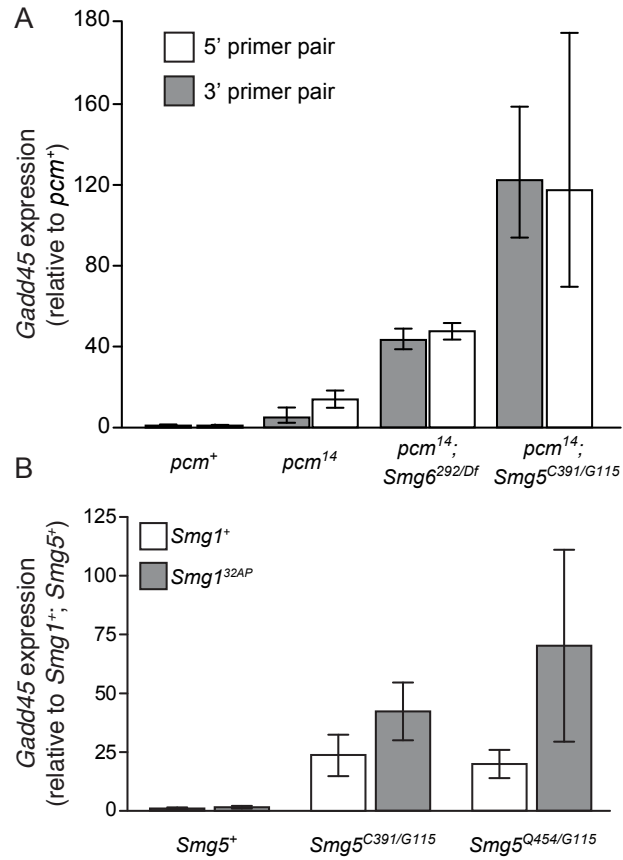

**Figure S4. Absolute expression of *Gadd45* in double mutant conditions. (A)** *Gadd45* 5' and 3' fragments are equivalently stabilized in *pcm*; *Smg5* and *pcm*; *Smg6* double mutants. *Gadd45* expression normalized to control determined by qPCR using primers 5' or 3' to the termination codon in *pcm* single and double mutants. Error bars represent 1 SD. **(B)** Absolute expression of the endogenous NMD target *Gadd45* in *Smg1*<sup>32AP</sup> mutants compared to *Smg1*<sup>+</sup> controls in *Smg5*<sup>+</sup> and mutant backgrounds. Error bars represent 2 SEM.
