# Supplementary material
Source: publisher figshare collection journal article supplement (https://gsajournals.figshare.com/articles/dataset/_/6494774)
Supplement: Supplementary file 1 [file 1 › Fig S5.pdf]

|                                                                                   | <u>Length</u><br>(bp) | <u>Expression</u><br><u>level</u> | <u>NMD</u><br><u>sensitivity</u> |
|-----------------------------------------------------------------------------------|-----------------------|-----------------------------------|----------------------------------|
| 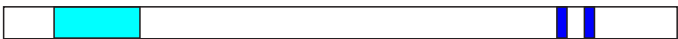 | 720 (full length)     | 1.0                               | 4.4                              |
| 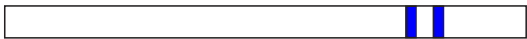 | 550                   | 1.7                               | 1.9                              |
| 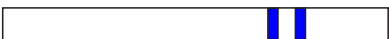 | 400                   | 2.7                               | 1.1                              |
| 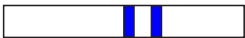 | 250                   | 2.8                               | 1.1                              |
| 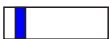 | 100                   | 4.6                               | 1.2                              |
| 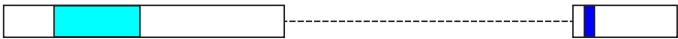 | 400                   | 2.1                               | 1.4                              |
| 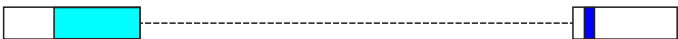 | 250                   | 3.8                               | 1.1                              |

**Figure S5. SV40 3'UTR deletion constructs tested for expression and NMD sensitivity.** The full length 3' UTR is shown in schematic and length given in base-pairs (bp). Cyan box, SV40 3' UTR intron; blue boxes, predicted polyadenylation sites; dashed line, internal deletions. Expression level is the GFP signal observed when expressing the construct using an *e22c-GAL4* (epithelial) driver, normalized to the expression observed in the full-length construct. NMD sensitivity is the ratio of expression in an *Upf2<sup>25G</sup>* genetic background compared to a *Upf2<sup>+</sup>* genetic background (the higher the value the more sensitive the construct is to loss of NMD). For the experiments shown in Figure 3, the deletion used was the 100bp construct.
