# Supplementary material
Source: publisher figshare collection journal article supplement (https://gsajournals.figshare.com/articles/dataset/_/6494774)
Supplement: Supplementary file 1 [file 1 › Fig S6.pdf]

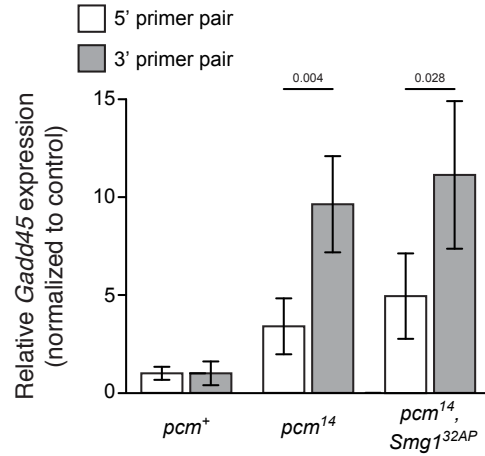

**Figure S6. *Gadd45* 3' fragments are preferentially stabilized in *pcm*, *Smg1* double mutants.** *Gadd45* expression normalized to control determined by qPCR using primers 5' or 3' to the termination codon in *pcm* single and double mutants. *pcm*<sup>+</sup> and *pcm*<sup>14</sup> conditions are duplicated from supplemental figure 4A. Error bars represent 2 SEM. p-value listed between indicated conditions determined by two-sided Student's t-test. n ≥ 3 for all conditions.
