# Supplementary material
Source: publisher figshare collection journal article supplement (https://gsajournals.figshare.com/articles/dataset/_/6494774)
Supplement: Supplementary file 1 [file 1 › Table S1.xlsx]

## Sheet: Sheet1
	Table S1. Drosophila mutant alleles used in this study.
	Gene	Allele name(s)	Reference
	DHR78	3	Fisk and Thummel, 1998
	Gadd45	F17	Nelson et al., 2016
	pcm	14	Waldron et al., 2015
	Smg1	32AP	Metzstein and Krasnow, 2006
	Smg5	A1, C391,EI1, G115,MI1,Q376, Q454	This work
	Smg6	292	Frizzell et al., 2012
	Upf2	25G	Metzstein and Krasnow, 2006
