# Supplementary material
Source: publisher figshare collection journal article supplement (https://gsajournals.figshare.com/articles/dataset/_/6494774)
Supplement: Supplementary file 1 [file 1 › Table S2.xlsx]

## Sheet: Sheet1
	Table S2. Molecular changes of all Smg5 mutant alleles.
	Allele	Position from 5' end of Smg5 locus	Codon Change	Amino Acid Change
	A1	541	C-to-T	Q64X
	Q454	674	G-to-A	G108D
	EI1	711	G-to-A	W120X
	Q376	1190	C-to-T	S280F
	MI1	1822	C-to-T	Q491X
	G115	1969	C-to-T	Q540X
	C391	2227	G-to-A	Splice Acceptor Site
	Positions are listed from 5' end of the first exon of the Smg5 gene locus.
